# Supplementary material
Source: Springer Nature journal article supplement (https://www.springermedizin.de/resource/supplementary/13002_2013_393_MOESM1_ESM.pdf/9626944)
Supplement: MOESM1 [file 9626944]

63°20'0"W

63°0'0"W

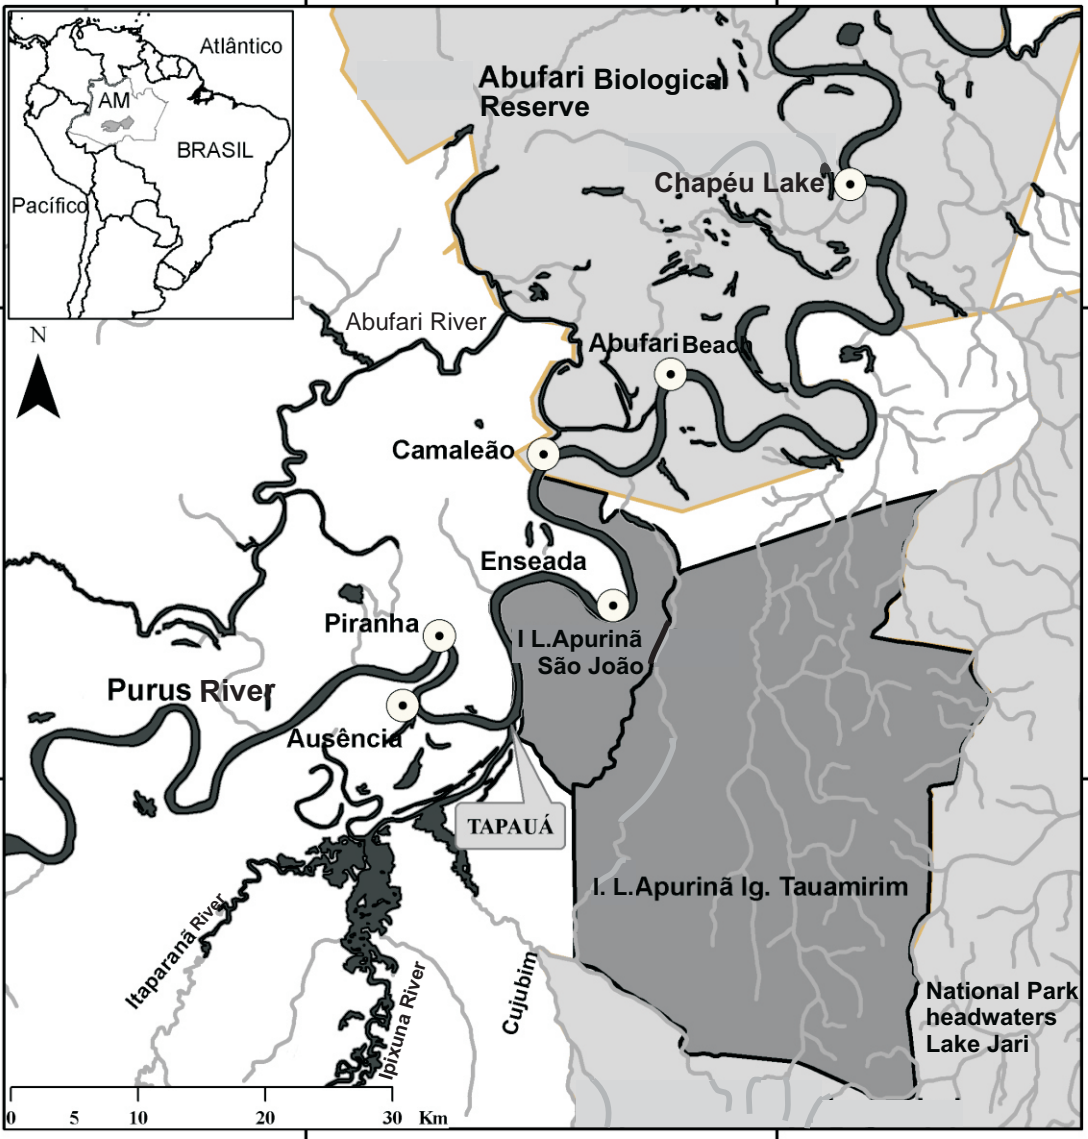

5°20'0"S

5°20'0"S

5°40'0"S

5°40'0"S

63°20'0"W

63°0'0"W

0 5 10 20 30 Km

Atlântico

AM

BRASIL

Pacífico

N

Abufari Biological Reserve

Chapéu Lake

Abufari River

Abufari Beach

Camaleão

Enseada

I. L. Apurinã  
São João

Piranha

Purus River

Ausência

TAPAUÁ

I. L. Apurinã Ig. Tauamirim

Itaparana River

Ipixuna River

Cujubim

National Park  
headwaters  
Lake Jari
